# Supplementary material for: Retarding the capacity fading and voltage decay of Li-rich Mn-based cathode materials via a compatible layer coating for high-performance lithium-ion batteries
Source: Royal Society of Chemistry journal article supplement (doi:10.1039/d4ra03660c), 2024-01-01
Supplement: d4ra03660c1.pdf [file d4ra03660c1.pdf]

## Supporting Information

### Retarding the capacity fading and voltage decay of Li-rich Mn-based cathode material via compatible layer coating for high performance lithium-ions batteries

Shaofeng Liu,<sup>‡a,b</sup> Haifeng Yue,<sup>‡a,b</sup> Yan Mo,<sup>a,b</sup> Liang Luo,<sup>b</sup> Xiaozhen Wu,<sup>b</sup> Shunyi Yang,<sup>b</sup> Youyuan Huang<sup>\*b</sup> and Guohui Yuan<sup>\*a</sup>

<sup>a</sup> School of Chemistry and Chemical Engineering, Harbin Institute of Technology, Harbin 150001, People's Republic of China.

<sup>b</sup> Shenzhen BTR nanotechnology Co., Ltd., Shenzhen 518106, People's Republic of China.

\*E-mail: ygh@hit.edu.cn, huangyouyuan@btrchina.com

<sup>‡</sup> These authors contributed equally.

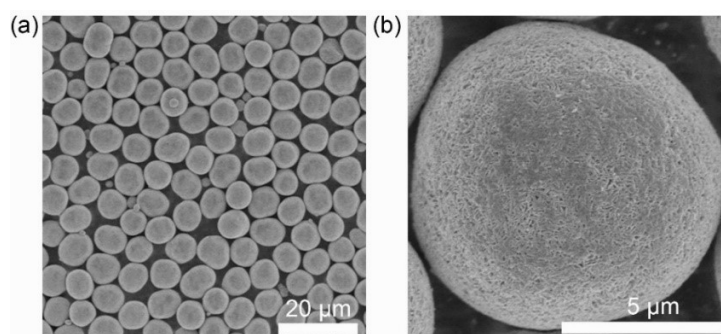

Fig. S1 SEM image of as-prepared precursor.

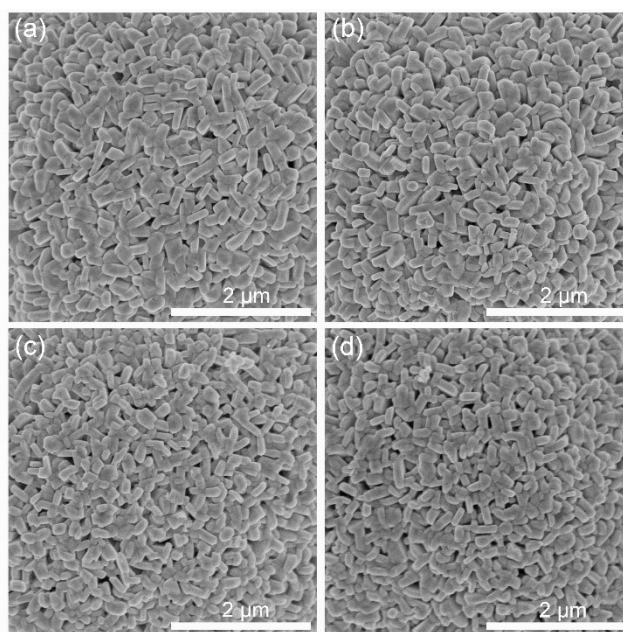

Fig. S2 Enlarged SEM images of (a) LLO, (b) LLO-1, (c) LLO-2 and (d) LLO-3.

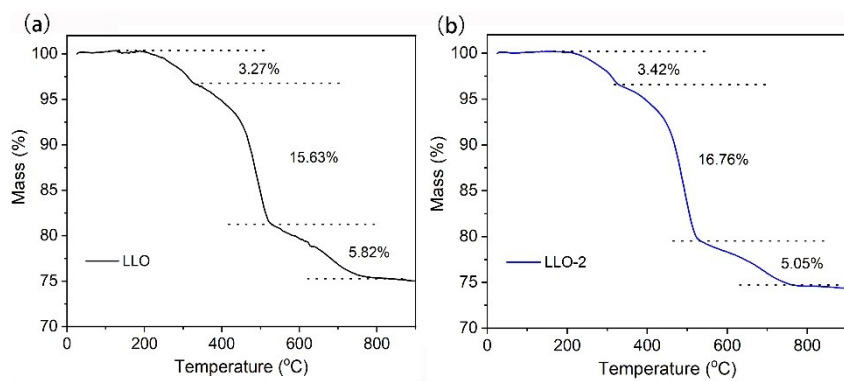

Fig. S3 TGA analysis of (a) LLO and (b) LLO-2.

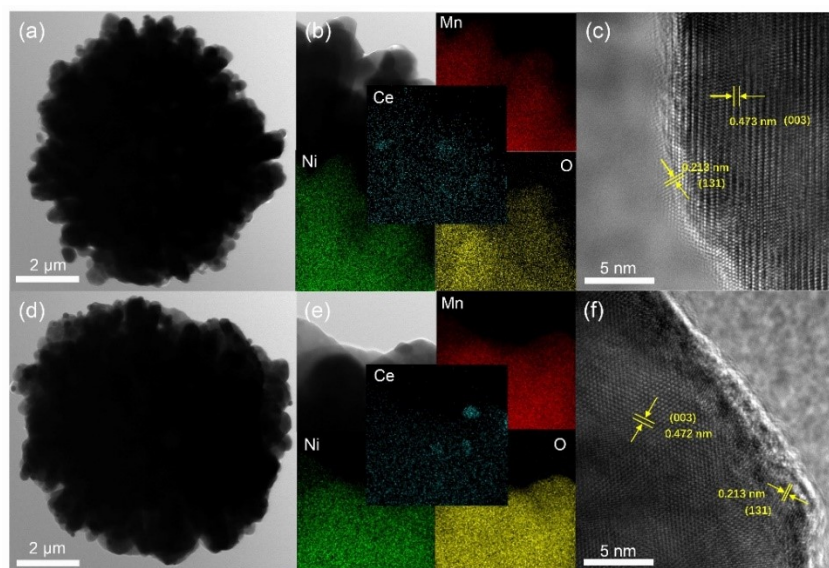

Fig. S4 (a) TEM image, (b) EDS elemental mapping and (c) HRTEM image of LLO-1, (d) TEM image, (e) EDS elemental mapping and (f) HRTEM image of LLO-3.

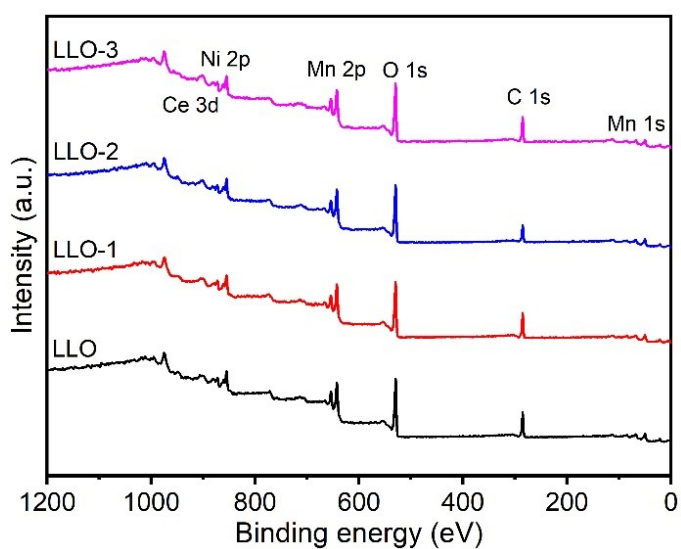

Fig. S5 XPS survey spectra of pristine and Ce-modified samples.

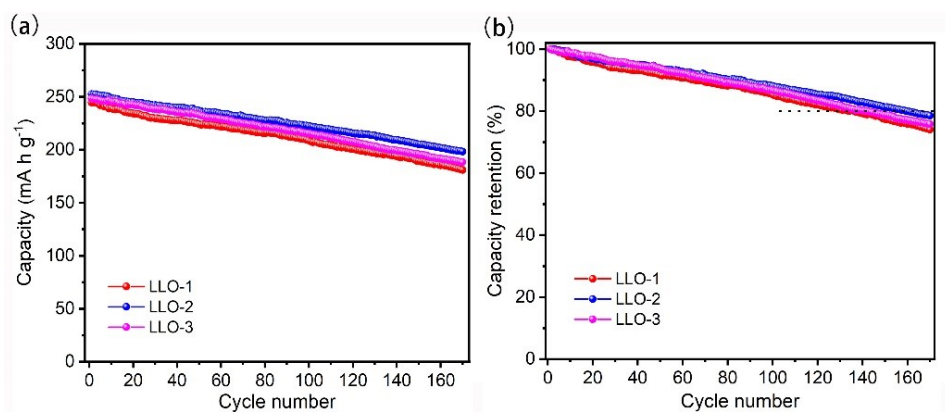

Fig. S6 (a) Discharge capacity and (b) corresponding capacity retention vs. cycle number for LLO-1, LLO-2 and LLO-3 at 0.2C between 2.0 and 4.8 V.

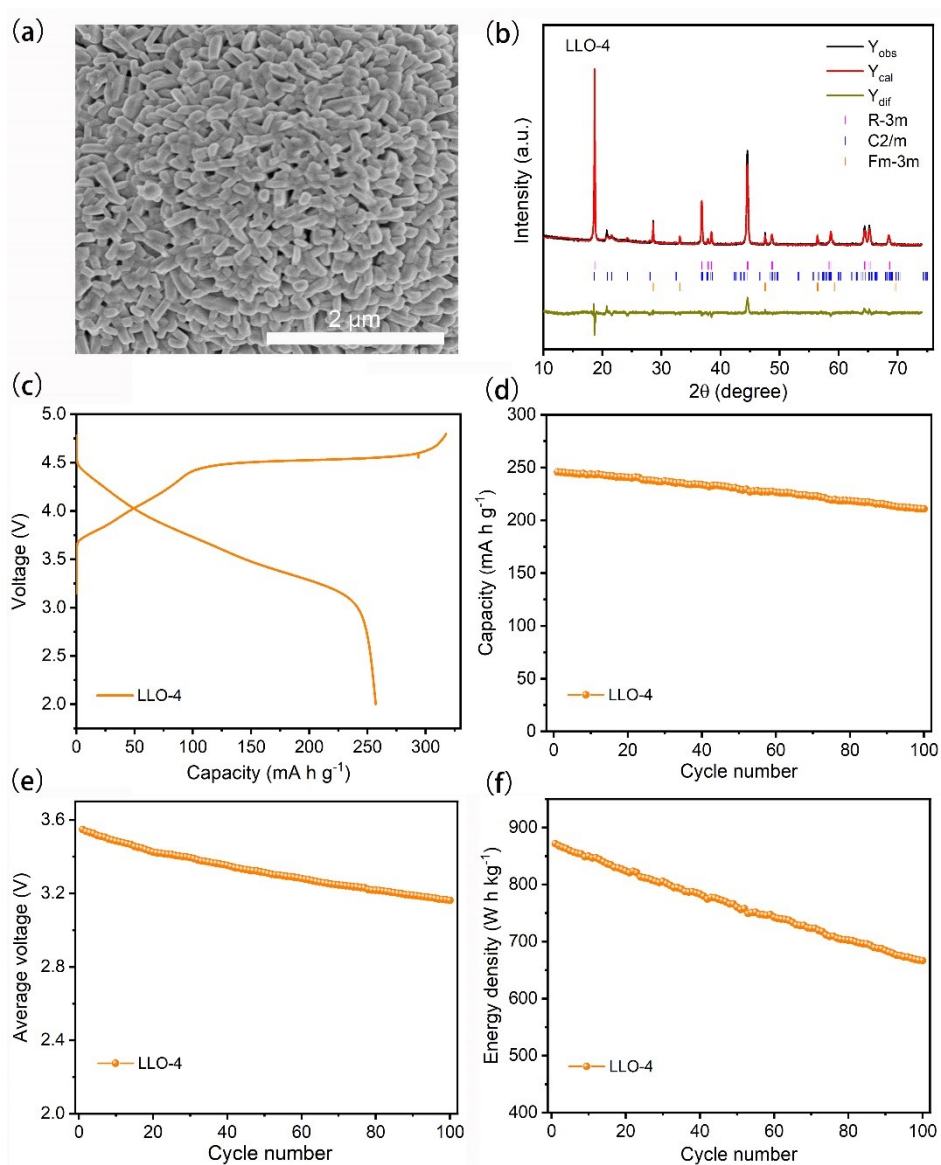

Fig. S7 (a) SEM image and (b) Riveted refined XRD profiles of LLO-4, (c) initial charge-discharge curve profiles, (d) capacity retention, (e) median voltage decay, (f) energy density retention of LLO-4 at 0.2C between 2.0 and 4.8 V.

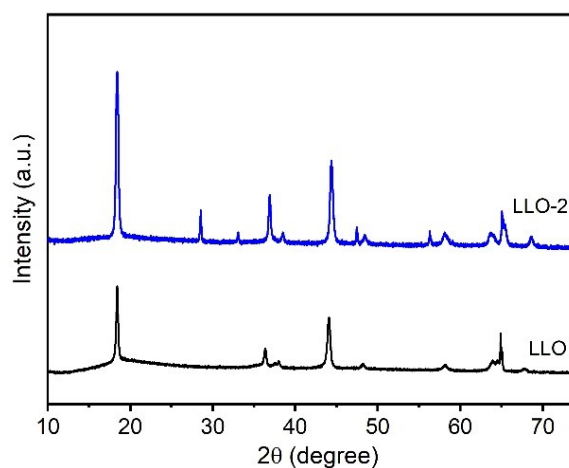

Fig. S8 XRD patterns of LLO and LLO-2 after cycling.

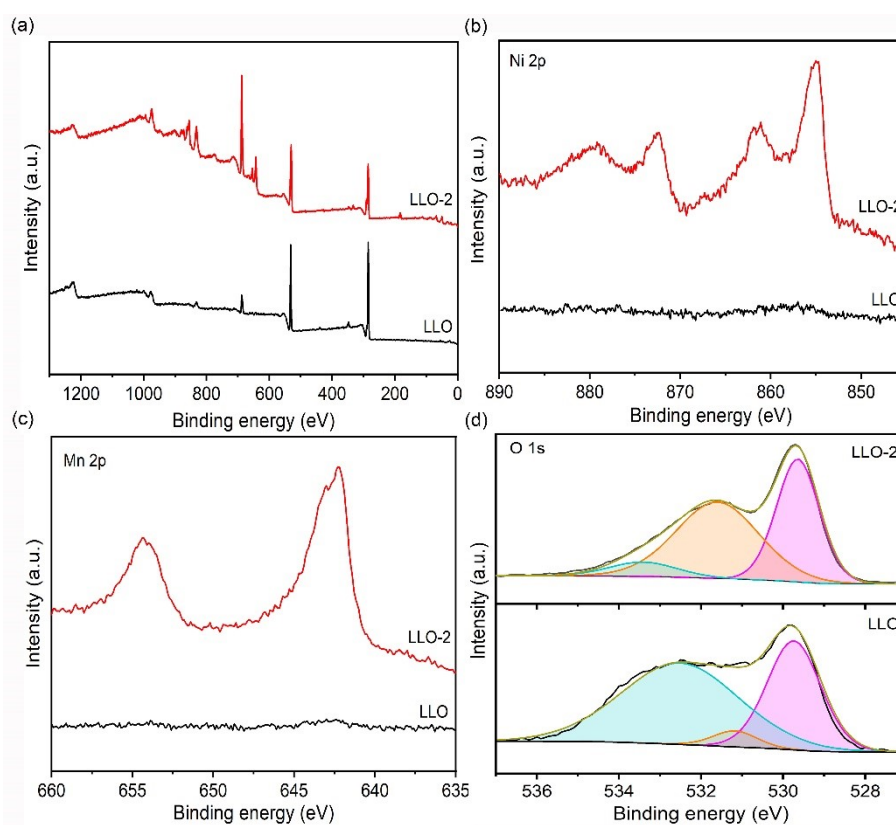

Fig. S9 XPS spectra of (a) full spectra, (b) Ni 2p, (c) Mn 2p, (d) O 1s for LLO and LLO-2 after 100 cycles at 0.2C.

Table S1. ICP-OES results for as-prepared materials

| Sample | Li (%) | Ni (%) | Mn (%) | Ce (%) |
|--------|--------|--------|--------|--------|
| LLO    | 9.79   | 13.42  | 38.81  | 0      |
| LLO-1  | 9.79   | 13.51  | 38.54  | 2.92   |
| LLO-2  | 9.79   | 13.37  | 38.65  | 4.98   |
| LLO-3  | 9.79   | 13.47  | 38.92  | 6.89   |

Table S2. Results of XRD Rietveld refinement

| Sample             |       | LLO    | LLO-1   | LLO-2   | LLO-3   | LLO-4   |         |
|--------------------|-------|--------|---------|---------|---------|---------|---------|
| Lattice parameters | R-3m  | a      | 2.8599  | 2.8615  | 2.8626  | 2.8609  | 2.8602  |
|                    |       | c      | 14.2514 | 14.2725 | 14.2753 | 14.2556 | 14.2519 |
|                    |       | c/a    | 4.983   | 4.988   | 4.987   | 4.983   | 4.983   |
|                    | C2/m  | a      | 4.9564  | 4.9466  | 4.9548  | 4.9352  | 4.9674  |
|                    |       | b      | 8.5788  | 8.6013  | 8.5785  | 8.5886  | 8.5392  |
|                    | c     | 5.0372 | 5.0813  | 5.0378  | 5.0829  | 5.0431  |         |
|                    | Fm-3m | a      |         | 5.4149  | 5.4073  | 5.4146  | 5.4078  |
| Weight             | R-3m  | 75.33  | 72.99   | 74.68   | 71.47   | 61.36   |         |
| Fraction (%)       | C2/m  | 24.67  | 25.84   | 22.34   | 23.63   | 36.29   |         |
|                    | Fm-3m |        | 1.17    | 2.98    | 4.90    | 2.36    |         |
| Reliability Factor | Rwp   | 5.20   | 4.93    | 5.96    | 4.97    | 2.71    |         |
|                    | Rp    | 3.32   | 3.30    | 4.28    | 3.32    | 4.01    |         |

Table S3. Fitted parameter of EIS spectra of prepared samples for before and after 100 cycles

|       | Samples         | LLO   | LLO-1 | LLO-2 | LLO-3 |
|-------|-----------------|-------|-------|-------|-------|
| 1st   | $R_s/\Omega$    | 6.65  | 5.51  | 4.81  | 5.09  |
|       | $R_{ct}/\Omega$ | 14.92 | 14.36 | 8.49  | 12.05 |
| 100th | $R_s/\Omega$    | 4.94  | 6.91  | 6.26  | 5.69  |
|       | $R_{st}/\Omega$ | 76.25 | 35.40 | 28.92 | 32.63 |
|       | $R_{ct}/\Omega$ | 267.8 | 165.9 | 157.2 | 179.1 |
